# Supplementary material for: Fungi present distinguishable isotopic signals in their lipids when grown on glycolytic versus tricarboxylic acid cycle intermediates
Source: Copernicus journal article supplement (doi:10.5194/bg-22-3127-2025), 2025-07-01
Supplement: Supplementary file 1 [file bg-22-3127-2025-supplement.zip]

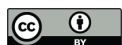

*Supplement of*

**Fungi present distinguishable isotopic signals in their lipids when grown on glycolytic versus tricarboxylic acid cycle intermediates**

**Stanislav Jabinski et al.**

*Correspondence to:* Travis B. Meador ([travis.meador@bc.cas.cz](mailto:travis.meador@bc.cas.cz))

- [bg-22-3127-2025-supplement-title-page.pdf](#)
- [Jabinski et al Biogeosci\\_SM](#)
  - [Table S1.xlsx](#)
  - [Text S1 - Mixing model.pdf](#)

The copyright of individual parts of the supplement might differ from the article licence.
