# Supplementary material for: Fungi present distinguishable isotopic signals in their lipids when grown on glycolytic versus tricarboxylic acid cycle intermediates
Source: Copernicus journal article supplement (doi:10.5194/bg-22-3127-2025), 2025-07-01
Supplement: Supplementary file 1 [file bg-22-3127-2025-supplement.zip]

## Sheet: 2022 EXPERIMENT
Table S1. Fungal cultivation and IRMS analyses of biomass and medium water. Control samples were incubations of media without inoculation. Colored cells indicate relatively poor (red) to suffient growth (green) of fungal biomass. Blank field mean no data points.
ID	Species	group (A - Ascomycota, B - Basidiomycota, Z - Zygomycota)	Substrate	Biological Replicate	Inoculation date	Harvest date	Days of cultivation	pH at harvest	Dry weight (mg)	CO2 in the headspace at harvest (%, v/v)	d13C (CO2 headspace)	d13C C18:2 (‰, VPDB)	d13C Ergosterol (‰, VPDB)	d2H water (‰, VSMOW)	d2H C18:2 (‰, VSMOW)	d2H Ergosterol (‰, VSMOW)	eps C18:2/H2O	eps ergosterol/H2O	water H assimilation efficiency regression parameters for C18:2
																			aw (slope)	slope error	y-int	y-int error	R2
1	Paxillus involutus (PIN2)	B	Glucose	1	2022-05-12	2022-07-12	61	3.16	7.1	4.3324	-0.117	-21.3658	-19.4488	-55.2366	-203.514	-149.339	-156.946	-99.6044	0.749368	0.0622094	-165.691	5.59508	0.979744
2	Paxillus involutus (PIN2)	B	Glucose	2	2022-05-12	2022-07-12	61	3.18	16.7	24.4073	1.229	-21.5427	-19.826	-57.2299	-225.071	-162.565	-178.03	-111.729
3	Paxillus involutus (PIN2)	B	Glucose	3	2022-05-12	2022-07-12	61	3.09	8	5.82966	2.342			-57.664	-195.63	-168.523	-146.409	-117.642
4	Paxillus involutus (PIN2)	B	Glucose	1	2022-05-12	2022-07-12	61	3.15	10.8	5.49824	230.789			65.4399	-117.423	-54.4201	-171.632	-112.498
5	Paxillus involutus (PIN2)	B	Glucose	2	2022-05-12	2022-07-12	61	3.11	5.7	7.16817	190.185	-16.6534	-16.7116	63.8642
6	Paxillus involutus (PIN2)	B	Glucose	3	2022-05-12	2022-07-12	61	3.02	3.1	3.8844	368.981	-16.6503	-20.0815	64.6518
7	Paxillus involutus (PIN2)	B	Glucose	1	2022-05-12	2022-07-12	61	3.02	2.7	3.09866	331.788			167.028
8	Paxillus involutus (PIN2)	B	Glucose	2	2022-05-12	2022-07-12	61	3.14	1.4	1.47702	686.254			167.326
9	Paxillus involutus (PIN2)	B	Glucose	3	2022-05-12	2022-07-12	61	3.04	3	2.95931	376.459			162.824	-43.2518	-84.5241	-177.22	-212.713
10	Paxillus involutus (PIN2)	B	Glucose	1	2022-05-12	2022-07-12	61	3.61	0.2	0.651862	1673.04			362.72
11	Paxillus involutus (PIN2)	B	Glucose	2	2022-05-12	2022-07-12	61	3.32	0.8	1.04842	1115.82			368.259
12	Paxillus involutus (PIN2)	B	Glucose	3	2022-05-12	2022-07-12	61	3.37	0.5	0.775193	1455.82			357.19
13	Phanerodontia chrysosporium	B	Glucose	1	2022-05-12	2022-05-30	18	3.85	3.8	1.61279	4.097	-24.7644	-22.4317	-48.5946	-124.21	-143.236	-79.4772	-99.4757	0.368526	0.028121	-105.616	6.07976	0.977239
14	Phanerodontia chrysosporium	B	Glucose	2	2022-05-12	2022-05-30	18	4.87	2	1.03134	0.295	-24.8061		-52.0851	-127.971	-115.908	-80.0553	-67.3303
15	Phanerodontia chrysosporium	B	Glucose	3	2022-05-12	2022-05-30	18	3.68	4.8	1.92228	0.556			-60.2915
16	Phanerodontia chrysosporium	B	Glucose	1	2022-05-12	2022-05-30	18	3.72	6.7	2.39157	1096.62			61.0538
17	Phanerodontia chrysosporium	B	Glucose	2	2022-05-12	2022-05-30	18	4.4	1.7	1.24891	1171.03			59.6416
18	Phanerodontia chrysosporium	B	Glucose	3	2022-05-12	2022-05-30	18	3.5	13.2	3.39171	410.726	-13.7881	-21.3696	63.5998	-70.3606	-14.2343	-125.95	-73.1799
19	Phanerodontia chrysosporium	B	Glucose	1	2022-05-12	2022-05-30	18	4.23	3	1.48988	1635.51			158.548
20	Phanerodontia chrysosporium	B	Glucose	2	2022-05-12	2022-05-30	18	3.52	9.9	2.93317	444.309	-17.2981	-21.8655	161.392
21	Phanerodontia chrysosporium	B	Glucose	3	2022-05-12	2022-05-30	18	3.56	5.7	2.20014	603.904	-16.7483	-17.1938	157.727	-57.8628	-74.8552	-186.218	-200.896
22	Phanerodontia chrysosporium	B	Glucose	1	2022-05-12	2022-05-30	18	4.77	2	1.19726	1347.32			350.411
23	Phanerodontia chrysosporium	B	Glucose	2	2022-05-12	2022-05-30	18	3.62	5	2.03275	786			344.269	34.0706	-10.3799	-230.756	-263.823
24	Phanerodontia chrysosporium	B	Glucose	3	2022-05-12	2022-05-30	18	3.55	8	2.61504	647.509			357.683	15.7847		-251.825
25	Umbelopsis	Z	Glucose	1	2022-05-12	2022-05-17	5	2.75	64.7	11.2172	-9.13	-21.7672		-39.9932	-165.252	-41.0978	-130.477	-1.15066	0.577605	0.0049486	-140.215	1.22231	0.999853
26	Umbelopsis	Z	Glucose	2	2022-05-12	2022-05-17	5	2.85	48.5	8.95678	-9.851	-20.6928		-48.083	-166.089	-122.027	-123.966	-77.679
27	Umbelopsis	Z	Glucose	3	2022-05-12	2022-05-17	5	3	37.1	6.5707	4.019			-52.5042
28	Umbelopsis	Z	Glucose	1	2022-05-12	2022-05-17	5	2.87	51.5	11.1881	362.417			61.597
29	Umbelopsis	Z	Glucose	2	2022-05-12	2022-05-17	5	2.76	62.5	11.8364	118.139	-20.8476		63.2255
30	Umbelopsis	Z	Glucose	3	2022-05-12	2022-05-17	5	2.95	46.5	7.98721	212.315			102.105
31	Umbelopsis	Z	Glucose	1	2022-05-12	2022-05-17	5	2.45	134.7	25.2008	52.933			165.559
32	Umbelopsis	Z	Glucose	2	2022-05-12	2022-05-17	5	2.4	140.6	23.6722	49.193	-21.4694		170.44
33	Umbelopsis	Z	Glucose	3	2022-05-12	2022-05-17	5	2.45	133.7	25.188	50.311			167.255
34	Umbelopsis	Z	Glucose	1	2022-05-12	2022-05-17	5	2.39	143.7	25.9933	61.503			344.386	58.4858	9.92832	-212.662	-248.781
35	Umbelopsis	Z	Glucose	2	2022-05-12	2022-05-17	5	2.44	134.7	24.094	65.223	-20.9913		348.605	61.396	102.222	-212.967	-182.695
36	Umbelopsis	Z	Glucose	3	2022-05-12	2022-05-17	5	2.51	114.4	20.856	82.02			353.934
37	Mortierella	Z	Glucose	1	2022-05-12	2022-05-23	11	2.44	104.2	24.884	-9.692	-21.3907	-26.3164	-38.9268	-116.105		-80.3039		0.66764	0.00615541	-89.6152	1.55069	0.99983
38	Mortierella	Z	Glucose	2	2022-05-12	2022-05-23	11	2.39	118.5	27.7927	65.7	-22.3609		-50.1111	-122.637		-76.3522
39	Mortierella	Z	Glucose	3	2022-05-12	2022-05-23	11	2.37	114.5	29.0753	-10.135			-52.1272
40	Mortierella	Z	Glucose	1	2022-05-12	2022-05-23	11	2.35	119.6	30.0464	45.047	-20.5319	-23.2577	62.6496
41	Mortierella	Z	Glucose	2	2022-05-12	2022-05-23	11	2.37	117.6	29.2103	134.171			66.2633
42	Mortierella	Z	Glucose	3	2022-05-12	2022-05-23	11	2.38	116.7	29.4881	42.274			61.3312
43	Mortierella	Z	Glucose	1	2022-05-12	2022-05-23	11	2.43	105.6	24.6325	78.795	-20.4511	-23.1259	155.341
44	Mortierella	Z	Glucose	2	2022-05-12	2022-05-23	11	2.53	95.4	19.0033	81.119			157.066
45	Mortierella	Z	Glucose	3	2022-05-12	2022-05-23	11	2.44	103.4	22.099	170.545			172.283
46	Mortierella	Z	Glucose	1	2022-05-12	2022-05-23	11	2.45	104.2	24.484	218.817	-20.9919	-22.1156	349.003	145.831		-150.609
47	Mortierella	Z	Glucose	2	2022-05-12	2022-05-23	11	2.44	109.7	22.577	107.057			357.813	146.904		-155.33
48	Mortierella	Z	Glucose	3	2022-05-12	2022-05-23	11	2.45	108.7	24.5715	47.719			366.409
49	Paecilomyces lilacinus	A	Glucose	1	2022-05-12	2022-05-17	5	2.23	218.7	34.0712	-8.384	-23.2968	-22.0599	-40.4557	-147.535		-111.593		0.60273	0.028277	-134.035	7.08114	0.995617
50	Paecilomyces lilacinus	A	Glucose	2	2022-05-12	2022-05-17	5	2.21	216.8	29.9701	-9.386	-22.659	-22.2042	-47.4606	-173.328	-186.57	-132.139	-146.041
51	Paecilomyces lilacinus	A	Glucose	3	2022-05-12	2022-05-17	5	2.28	188.2	25.734	-9.826			-51.0229
52	Paecilomyces lilacinus	A	Glucose	1	2022-05-12	2022-05-17	5	2.33	191	24.1927	53.865			61.0279
53	Paecilomyces lilacinus	A	Glucose	2	2022-05-12	2022-05-17	5	2.24	230.6	29.2162	42.878	-23.2939	-24.0169	64.871
54	Paecilomyces lilacinus	A	Glucose	3	2022-05-12	2022-05-17	5	2.23	229.6	27.5764	48.614
55	Paecilomyces lilacinus	A	Glucose	1	2022-05-12	2022-05-17	5	2.24	208.3	25.5053	32.735			153.102
56	Paecilomyces lilacinus	A	Glucose	2	2022-05-12	2022-05-17	5	2.29	200.8	26.3994	47.202	-23.0461	-25.151	162.445
57	Paecilomyces lilacinus	A	Glucose	3	2022-05-12	2022-05-17	5	2.31	205.9	27.3772	109.356			166.203
58	Paecilomyces lilacinus	A	Glucose	1	2022-05-12	2022-05-17	5	2.39	158.6	20.7483	57.585			351.836	80.8678	58.9238	-200.445	-216.677
59	Paecilomyces lilacinus	A	Glucose	2	2022-05-12	2022-05-17	5	2.45	152.4	18.2882	67.923	-24.0845	-23.1947	350.946	74.4514	43.7108	-204.667	-227.422
60	Paecilomyces lilacinus	A	Glucose	3	2022-05-12	2022-05-17	5	2.25	224.7	31.2194	38.865			361.058
61	Penicillium janczewskii	A	Glucose	1	2022-05-12	2022-05-17	5	2.4	169.7	20.5539	-10.407	-23.3794	-22.1976	-36.5022					0.6502	0.0542235	-109.78	13.6493	0.986281
62	Penicillium janczewskii	A	Glucose	2	2022-05-12	2022-05-17	5	2.29	185.6	30.2838	-2.197	-23.106	-23.0661	-48.5833	-160.631	-194.121	-117.769	-152.97
63	Penicillium janczewskii	A	Glucose	3	2022-05-12	2022-05-17	5	2.3	182.1	24.1398	-10.384			-51.3014	-123.618	-137.448	-76.2276	-90.8051
64	Penicillium janczewskii	A	Glucose	1	2022-05-12	2022-05-17	5	2.28	173.6	32.4175	142.142			64.8778
65	Penicillium janczewskii	A	Glucose	2	2022-05-12	2022-05-17	5	2.29	160.1	33.1474	23.102	-21.8883	-22.3387	67.3423
66	Penicillium janczewskii	A	Glucose	3	2022-05-12	2022-05-17	5	2.28	169.1	32.8185	131.407			66.0631
67	Penicillium janczewskii	A	Glucose	1	2022-05-12	2022-05-17	5	2.28	163.8	33.5604	37.535			160.326
68	Penicillium janczewskii	A	Glucose	2	2022-05-12	2022-05-17	5	2.27	193	33.2987	61.303	-22.7038	-22.7114	167.58
69	Penicillium janczewskii	A	Glucose	3	2022-05-12	2022-05-17	5	2.35	157.1	32.6448	92.908			165.108
70	Penicillium janczewskii	A	Glucose	1	2022-05-12	2022-05-17	5	2.33	161.8	32.3827	42.446			344.604	104.139	30.7858	-178.837	-233.391
71	Penicillium janczewskii	A	Glucose	2	2022-05-12	2022-05-17	5	2.34	161.9	33.0989	44.6	-21.7347	-21.4386	360.159	134.281	42.8253	-166.067	-233.306
72	Penicillium janczewskii	A	Glucose	3	2022-05-12	2022-05-17	5	2.31	161.2	33.074	51.186			366.797
73	Control		Glucose	1	2022-05-12	2022-07-12	61	5.28		0.371469	44.329
74	Control		Glucose	2	2022-05-12	2022-07-12	61	5.33		0.322558	15.675
75	Control		Glucose	1	2022-05-12	2022-07-12	61	5.35		0.284821	2254.58
76	Control		Glucose	2	2022-05-12	2022-07-12	61	5.35		0.308644	2241.59
77	Control		Glucose	1	2022-05-12	2022-07-12	61	5.39		0.373788	2909.18
78	Control		Glucose	2	2022-05-12	2022-07-12	61	5.41		0.347224	3202.12
79	Control		Glucose	1	2022-05-12	2022-07-12	61	5.34		0.325509	3023.45
80	Control		Glucose	2	2022-05-12	2022-07-12	61	5.36		0.325299	3138.23
81	Paxillus involutus (PIN2)	B	Succinate	1	2022-06-01	2022-11-11	163	4.18	0	1.41145	48.276			-6.38409
82	Paxillus involutus (PIN2)	B	Succinate	2	2022-06-01	2022-11-11	163	4.18	0	0.922347	72.524			-49.2326
83	Paxillus involutus (PIN2)	B	Succinate	3	2022-06-01	2022-11-11	163	4.18	0.1	1.96191	-15.399			-53.1213
84	Paxillus involutus (PIN2)	B	Succinate	1	2022-06-01	2022-11-11	163	4.18	0	1.40323	546.345			64.9688
85	Paxillus involutus (PIN2)	B	Succinate	2	2022-06-01	2022-11-11	163	4.18	0.2	2.27646	455.8			78.434
86	Paxillus involutus (PIN2)	B	Succinate	3	2022-06-01	2022-11-11	163	4.18	0.1	1.74055	332.957			70.5156
87	Paxillus involutus (PIN2)	B	Succinate	1	2022-06-01	2022-11-11	163	4.18	0	1.44624	721.449			165.036
88	Paxillus involutus (PIN2)	B	Succinate	2	2022-06-01	2022-11-11	163	4.18	0	0.973788	1011.68			167.907
89	Paxillus involutus (PIN2)	B	Succinate	3	2022-06-01	2022-11-11	163	4.18	0.2	1.31827	839.906
90	Paxillus involutus (PIN2)	B	Succinate	1	2022-06-01	2022-11-11	163	4.18	0.4	1.89972	675.441			360.96
91	Paxillus involutus (PIN2)	B	Succinate	2	2022-06-01	2022-11-11	163	4.18	0.1	0.952073	1053.96			362.529
92	Paxillus involutus (PIN2)	B	Succinate	3	2022-06-01	2022-11-11	163	4.18	0	1.33282	1020.8			364.289
93	Phanerodontia chrysosporium	B	Succinate	1	2022-06-01	2022-06-28	27	4.15	0.9	1.30668	-5.091	-27.2145		-36.8439
94	Phanerodontia chrysosporium	B	Succinate	2	2022-06-01	2022-06-28	27	4.14	0.5	1.04673	-11.528
95	Phanerodontia chrysosporium	B	Succinate	3	2022-06-01	2022-06-28	27	4.14	0.7	1.33809	-5.065			-49.3617
96	Phanerodontia chrysosporium	B	Succinate	1	2022-06-01	2022-06-28	27	4.14	0.3	1.09628	611.883			61.45
97	Phanerodontia chrysosporium	B	Succinate	2	2022-06-01	2022-06-28	27	4.14	0.7	1.00499	643.117			61.9451
98	Phanerodontia chrysosporium	B	Succinate	3	2022-06-01	2022-06-28	27	4.14	1.4	1.75383	446.711	-24.9471		59.1442
99	Phanerodontia chrysosporium	B	Succinate	1	2022-06-01	2022-06-28	27	4.14	1.3	1.31258	1074.47	-22.9001		148.411
100	Phanerodontia chrysosporium	B	Succinate	2	2022-06-01	2022-06-28	27	4.14	1.1	1.33535	1143.4			160.925
101	Phanerodontia chrysosporium	B	Succinate	3	2022-06-01	2022-06-28	27	4.14	0.8	1.2584	1003.45	-22.7309		154.107
102	Phanerodontia chrysosporium	B	Succinate	1	2022-06-01	2022-06-28	27	4.14	0.9	1.122	1105.73			341.907
103	Phanerodontia chrysosporium	B	Succinate	2	2022-06-01	2022-06-28	27	4.14	0.7	1.12052	1181.36			345.155
104	Phanerodontia chrysosporium	B	Succinate	3	2022-06-01	2022-06-28	27	4.14	0.7	1.13528	1221.82			344.889
105	Umbelopsis	Z	Succinate	1	2022-06-01	2022-06-20	19	4.62	79.7	18.9721	-30.047	-30.7199	-34.2734	-39.9732	-194.502	-218.954	-160.963	-186.433	0.783442	0.0110466	-158.111	3.27316	0.999603
106	Umbelopsis	Z	Succinate	2	2022-06-01	2022-06-20	19	4.68	80.3	19.9585	-28.95	-30.4625	-34.298	-47.5398	-190.379	-257.087	-149.968	-220.007
107	Umbelopsis	Z	Succinate	3	2022-06-01	2022-06-20	19	4.71	88.4	20.4426	-29.591			-49.9399
108	Umbelopsis	Z	Succinate	1	2022-06-01	2022-06-20	19	4.63	80.9	19.0391	15.702			64.7277
109	Umbelopsis	Z	Succinate	2	2022-06-01	2022-06-20	19	4.58	74.1	17.4046	32.679	-28.8807	-32.5598	70.1878
110	Umbelopsis	Z	Succinate	3	2022-06-01	2022-06-20	19	4.67	83.2	18.9445	17.182			68.7056
111	Umbelopsis	Z	Succinate	1	2022-06-01	2022-06-20	19	4.49	66.6	15.5268	43.866			152.258
112	Umbelopsis	Z	Succinate	2	2022-06-01	2022-06-20	19	4.61	80.5	18.0082	28.834	-27.8591	-32.1229	164.337
113	Umbelopsis	Z	Succinate	3	2022-06-01	2022-06-20	19	4.53	72.1	16.0739	45.017			165.923
114	Umbelopsis	Z	Succinate	1	2022-06-01	2022-06-20	19	4.63	88.6	19.4656	16.196			412.556	165.937	56.4385	-174.591	-252.109
115	Umbelopsis	Z	Succinate	2	2022-06-01	2022-06-20	19	4.56	79.3	17.0144	21.946	-27.9703	-29.2438	420.865	170.875	58.5257	-175.942	-255.013
116	Umbelopsis	Z	Succinate	3	2022-06-01	2022-06-20	19	4.57	78.7	17.2417	22.794			420.787
117	Mortierella	Z	Succinate	1	2022-06-01	2022-06-28	27	4.75	82.3	28.293	-25.467			-34.5384					0.961869	0.0226096	-121.647	6.44483	0.998896
118	Mortierella	Z	Succinate	2	2022-06-01	2022-06-28	27	4.95	75.5	32.4449	-27.94	-31.394	-31.8568	-65.8724	-180.847		-123.083
119	Mortierella	Z	Succinate	3	2022-06-01	2022-06-28	27	5.05	84.8	32.6882	-28.614	-32.0145	-30.2381	-47.4792	-172.272		-131.014
120	Mortierella	Z	Succinate	1	2022-06-01	2022-06-28	27	4.99	90.5	31.4857	14.07			62.102
121	Mortierella	Z	Succinate	2	2022-06-01	2022-06-28	27	5.02	89.8	29.8037	7.062	-31.1	-30.4574	65.5914
122	Mortierella	Z	Succinate	3	2022-06-01	2022-06-28	27	5.12	66.8	32.524	5.284			66.0374
123	Mortierella	Z	Succinate	1	2022-06-01	2022-06-28	27	5.18	71.1	33.6455	19.365			158.994
124	Mortierella	Z	Succinate	2	2022-06-01	2022-06-28	27	5.14	54.6	33.581	22.242	-31.6527	-31.055
125	Mortierella	Z	Succinate	3	2022-06-01	2022-06-28	27	5.18	55.8	33.3527	19.144
126	Mortierella	Z	Succinate	1	2022-06-01	2022-06-28	27	5.23	59.3	33.8346	2.823			413.805	267.545		-103.452
127	Mortierella	Z	Succinate	2	2022-06-01	2022-06-28	27	5.18	56.5	33.332	8.49	-31.6977	-29.9711	383.643	256.997		-91.5307
128	Mortierella	Z	Succinate	3	2022-06-01	2022-06-28	27	5.2	87.8	33.7461	8.571			409.115
129	Paecilomyces lilacinus	A	Succinate	1	2022-06-01	2022-06-06	5	4.21	16.3	3.42607	289.311	-30.6388	-31.1187	-38.6393					0.777416	0.00991449	-90.9003	3.02728	0.999675
130	Paecilomyces lilacinus	A	Succinate	2	2022-06-01	2022-06-06	5	4.25	28.4	5.98208	-26.204	-31.0422	-29.0102	-49.5669	-132.917	-191.869	-87.6966	-149.724
131	Paecilomyces lilacinus	A	Succinate	3	2022-06-01	2022-06-06	5	4.29	27.9	6.09508	350.562			-53.2416	-128.718	-130.645	-79.7206	-81.7559
132	Paecilomyces lilacinus	A	Succinate	1	2022-06-01	2022-06-06	5	4.25	23.7	5.02895	1515.53			62.7811
133	Paecilomyces lilacinus	A	Succinate	2	2022-06-01	2022-06-06	5	4.21	13.6	3.17941	299.455	-29.8156	-26.9046	61.3624
134	Paecilomyces lilacinus	A	Succinate	3	2022-06-01	2022-06-06	5	4.3	35.7	7.1241	817.983			59.9664
135	Paecilomyces lilacinus	A	Succinate	1	2022-06-01	2022-06-06	5	4.27	30.6	6.40583	188.324			157.686
136	Paecilomyces lilacinus	A	Succinate	2	2022-06-01	2022-06-06	5	4.29	39.8	7.80295	130.178	-29.5217	-27.6109	196.089
137	Paecilomyces lilacinus	A	Succinate	3	2022-06-01	2022-06-06	5	4.33	46.5	9.74167	348.459
138	Paecilomyces lilacinus	A	Succinate	1	2022-06-01	2022-06-06	5	4.33	46.7	8.965	89.204			437.519	252.385	98.0711	-128.787	-236.135
139	Paecilomyces lilacinus	A	Succinate	2	2022-06-01	2022-06-06	5	4.3	40.5	8.13289	94.106	-30.5028	-33.064	419.778	232.199	109.868	-132.118	-218.28
140	Paecilomyces lilacinus	A	Succinate	3	2022-06-01	2022-06-06	5	4.28	35.2	7.44751	119.461
141	Penicillium janczewskii	A	Succinate	1	2022-06-01	2022-06-06	5	4.21	3.5	1.75952	-21.796	-29.825	-28.2592	-34.1219	-120.162	-59.6942	-89.0795	-26.4757	0.787214	0.0251121	-83.2868	7.61789	0.997969
142	Penicillium janczewskii	A	Succinate	2	2022-06-01	2022-06-06	5	4.2	6.2	2.22038	-25.477	-30.3469	-31.1529	-49.6383	-112.812	-48.8176	-66.4735	0.863535
143	Penicillium janczewskii	A	Succinate	3	2022-06-01	2022-06-06	5	4.19	4.6	1.58686	-22.347			-53.0998
144	Penicillium janczewskii	A	Succinate	1	2022-06-01	2022-06-06	5	4.22	4.2	1.46606	624.553	-27.719	-23.1789	61.4728
145	Penicillium janczewskii	A	Succinate	2	2022-06-01	2022-06-06	5	4.23	7.5	2.20794	328.284			64.4291
146	Penicillium janczewskii	A	Succinate	3	2022-06-01	2022-06-06	5	4.2	3.4	1.63429	571.854			63.6919
147	Penicillium janczewskii	A	Succinate	1	2022-06-01	2022-06-06	5	4.19	5.8	1.58981	641.071	-28.0284	-21.1171	180.251
148	Penicillium janczewskii	A	Succinate	2	2022-06-01	2022-06-06	5	4.21	7.8	2.30281	415.656			199.763
149	Penicillium janczewskii	A	Succinate	3	2022-06-01	2022-06-06	5	4.21	7.3	1.64146	575.335			195.045
150	Penicillium janczewskii	A	Succinate	1	2022-06-01	2022-06-06	5	4.21	5.3	2.65678	341.293			421.869	255.594	139.276	-116.942	-198.748
151	Penicillium janczewskii	A	Succinate	2	2022-06-01	2022-06-06	5	4.19	4.8	1.61743	531.617	-27.5577	-26.5875	424.489
152	Penicillium janczewskii	A	Succinate	3	2022-06-01	2022-06-06	5	4.2	7.5	2.1156	475.132			431.852	250.357	227.779	-126.755	-142.523
153	Control		Succinate	1	2022-06-01	2022-11-11	163	4.19		0.306746	130.824
154	Control		Succinate	2	2022-06-01	2022-11-11	163	4.19		0.33837	12.409
155	Control		Succinate	1	2022-06-01	2022-11-11	163	4.19		0.347646	2049.66
156	Control		Succinate	2	2022-06-01	2022-11-11	163	4.19		0.310752	1601.06
157	Control		Succinate	1	2022-06-01	2022-11-11	163	4.19		0.372523	2361.28
158	Control		Succinate	2	2022-06-01	2022-11-11	163	4.19		0.355868	2067.68
159	Control		Succinate	1	2022-06-01	2022-11-11	163	4.19		0.38454	1979.73
160	Control		Succinate	2	2022-06-01	2022-11-11	163	4.19		0.316655	1431.54
161	Mortierella	Z	Tannic acid	1	2022-06-29	2022-11-11	135	3.33	5.5	2.44048	-5.488
162	Mortierella	Z	Tannic acid	2	2022-06-29	2022-11-11	135	3.31	4.4	2.61883	1.898
163	Mortierella	Z	Tannic acid	3	2022-06-29	2022-11-11	135	3.33	4.2	2.39789	-13.04
164	Mortierella	Z	Tannic acid	1	2022-06-29	2022-11-11	135	3.34	5	2.38018	674.855
165	Mortierella	Z	Tannic acid	2	2022-06-29	2022-11-11	135	3.35	3.2	2.40548	706.41
166	Mortierella	Z	Tannic acid	3	2022-06-29	2022-11-11	135	3.28	3.1	2.79866	594.657
167	Mortierella	Z	Tannic acid	1	2022-06-29	2022-11-11	135	3.34	2.2	2.56086	721.464
168	Mortierella	Z	Tannic acid	2	2022-06-29	2022-11-11	135	3.34	5.6	2.63212	753.646
169	Mortierella	Z	Tannic acid	3	2022-06-29	2022-11-11	135	3.33	5.4	2.55053	743.544
170	Mortierella	Z	Tannic acid	1	2022-06-29	2022-11-11	135	3.31	5.9	2.50625	645.168
171	Mortierella	Z	Tannic acid	2	2022-06-29	2022-11-11	135	3.3	6	2.64139	682.34
172	Mortierella	Z	Tannic acid	3	2022-06-29	2022-11-11	135	3.31	5.5	2.64413	698.773
173	Paecilomyces lilacinus	A	Tannic acid	1	2022-06-29	2022-07-12	13	3.41	4.8	2.32263	-15.975			-62.8476	10.4429		78.2055		0.740247	0.0576545	43.7747	12.5824	0.97631
174	Paecilomyces lilacinus	A	Tannic acid	2	2022-06-29	2022-07-12	13	3.45	1.2	0.776458	-1.771	-25.3353	-26.2087	-60.9611	-13.947		50.0662
175	Paecilomyces lilacinus	A	Tannic acid	3	2022-06-29	2022-07-12	13	3.47	1.5	0.713212	-16.708	-25.5536	-23.4073	-62.8138	15.2691		83.3163
176	Paecilomyces lilacinus	A	Tannic acid	1	2022-06-29	2022-07-12	13	3.48	0.4	0.731975	1918.06
177	Paecilomyces lilacinus	A	Tannic acid	2	2022-06-29	2022-07-12	13	3.41	3.3	0.973999	1432.15
178	Paecilomyces lilacinus	A	Tannic acid	3	2022-06-29	2022-07-12	13	3.44	0.9	0.89494	1542.77
179	Paecilomyces lilacinus	A	Tannic acid	1	2022-06-29	2022-07-12	13	3.2	18.2	7.54533	170.012	-24.6975	-26.603	163.216	122.967		-34.6013
180	Paecilomyces lilacinus	A	Tannic acid	2	2022-06-29	2022-07-12	13	3.43	0.3	0.897259	1772.33
181	Paecilomyces lilacinus	A	Tannic acid	3	2022-06-29	2022-07-12	13	3.2	20	9.78953	117.762	-25.6299	-26.9782
182	Paecilomyces lilacinus	A	Tannic acid	1	2022-06-29	2022-07-12	13	3.43	0.8	0.872382	1426.4
183	Paecilomyces lilacinus	A	Tannic acid	2	2022-06-29	2022-07-12	13	3.18	19.9	9.24982	121.859	-24.6334	-25.46	344.111	317.775		-19.5938
184	Paecilomyces lilacinus	A	Tannic acid	3	2022-06-29	2022-07-12	13	3.38	2.8	1.2721	1158.48			359.31	313.52		-33.6862
185	Penicillium janczewskii	A	Tannic acid	1	2022-06-29	2022-07-20	21	3.52	0.8	0.850035	5.217								0.774646	0.0321364	-84.674	8.02773	0.99657
186	Penicillium janczewskii	A	Tannic acid	2	2022-06-29	2022-07-20	21	3.42	5.9	4.74245	-21.723	-24.8692	-29.8465	-59.6934	-120.003		-64.1379
187	Penicillium janczewskii	A	Tannic acid	3	2022-06-29	2022-07-20	21	3.13	21.6	16.4509	-25.674	-26.836	-30.8144	-63.2237	-144.273		-86.5189
188	Penicillium janczewskii	A	Tannic acid	1	2022-06-29	2022-07-20	21	2.93	39.7	29.2383	20.288
189	Penicillium janczewskii	A	Tannic acid	2	2022-06-29	2022-07-20	21	3.51	0.6	1.2194	1100.3
190	Penicillium janczewskii	A	Tannic acid	3	2022-06-29	2022-07-20	21	3	32	28.9982	26.083	-20.9649	-27.7979
191	Penicillium janczewskii	A	Tannic acid	1	2022-06-29	2022-07-20	21	2.99	33.2	29.3171	26.673	-21.6561	-28.2719
192	Penicillium janczewskii	A	Tannic acid	2	2022-06-29	2022-07-20	21	3.35	10.5	7.9889	178.321
193	Penicillium janczewskii	A	Tannic acid	3	2022-06-29	2022-07-20	21	2.98	36.8	26.3465	41.567	-18.7559	-27.8039
194	Penicillium janczewskii	A	Tannic acid	1	2022-06-29	2022-07-20	21	2.97	34.5	29.3197	37.676			342.504	172.944		-126.301
195	Penicillium janczewskii	A	Tannic acid	2	2022-06-29	2022-07-20	21	3	32.3	29.5817	35.421			353.177	196.324		-115.914
196	Penicillium janczewskii	A	Tannic acid	3	2022-06-29	2022-07-20	21	2.99	34	30.11	35.606
197	Control		Tannic acid	1	2022-06-29	2022-11-11	135	3.32		2.54589	-2.387
198	Control		Tannic acid	2	2022-06-29	2022-11-11	135	3.33		2.44933	-23.145
199	Control		Tannic acid	1	2022-06-29	2022-11-11	135	3.33		2.3688	676.377
200	Control		Tannic acid	2	2022-06-29	2022-11-11	135	3.35		2.52881	714.594
201	Control		Tannic acid	1	2022-06-29	2022-11-11	135	3.32		2.66374	737.464
202	Control		Tannic acid	2	2022-06-29	2022-11-11	135	3.32		2.68124	762.626
203	Control		Tannic acid	1	2022-06-29	2022-11-11	135	3.28		3.14863	651.536
204	Control		Tannic acid	2	2022-06-29	2022-11-11	135	3.3		2.33001	674.773
205	Paxillus involutus (PIN2)	B	Beta-Cyclodextrin	1	2022-08-09	2023-02-08	183	5.59	0.1	0.421012	71.187			-34.1482
206	Paxillus involutus (PIN2)	B	Beta-Cyclodextrin	2	2022-08-09	2023-02-08	183	5.6	0.1	0.506606	164.828			-48.2655
207	Paxillus involutus (PIN2)	B	Beta-Cyclodextrin	3	2022-08-09	2023-02-08	183	5.61	0	0.422909	2.196			-51.8732
208	Paxillus involutus (PIN2)	B	Beta-Cyclodextrin	1	2022-08-09	2023-02-08	183	5.65	0	0.518623	1290.64			66.1286
209	Paxillus involutus (PIN2)	B	Beta-Cyclodextrin	2	2022-08-09	2023-02-08	183	5.66	0	0.47688	1247.55			64.7859
210	Paxillus involutus (PIN2)	B	Beta-Cyclodextrin	3	2022-08-09	2023-02-08	183	5.66	0	0.431764	1362.25			67.1041
211	Paxillus involutus (PIN2)	B	Beta-Cyclodextrin	1	2022-08-09	2023-02-08	183	5.65	0	0.465285	1386.93			164.127
212	Paxillus involutus (PIN2)	B	Beta-Cyclodextrin	2	2022-08-09	2023-02-08	183	5.63	0	0.599578	1652.99			164.015
213	Paxillus involutus (PIN2)	B	Beta-Cyclodextrin	3	2022-08-09	2023-02-08	183	5.66	0	0.50766	1342.49			168.993
214	Paxillus involutus (PIN2)	B	Beta-Cyclodextrin	1	2022-08-09	2023-02-08	183	5.63	0	0.503233	1392.35			354.452
215	Paxillus involutus (PIN2)	B	Beta-Cyclodextrin	2	2022-08-09	2023-02-08	183	5.65	0	0.465917	1413.13			353.338
216	Paxillus involutus (PIN2)	B	Beta-Cyclodextrin	3	2022-08-09	2023-02-08	183	5.66	0	0.496065	1414.77			355.583
217	Phanerodontia chrysosporium	B	Beta-Cyclodextrin	1	2022-08-09	2022-10-26	78	5.52	0	1.70703	-4.503			-34.4875
218	Phanerodontia chrysosporium	B	Beta-Cyclodextrin	2	2022-08-09	2022-10-26	78	5.51	0.2	1.26008	7.502			-47.9859
219	Phanerodontia chrysosporium	B	Beta-Cyclodextrin	3	2022-08-09	2022-10-26	78	5.38	1.4	2.34877	0.934
220	Phanerodontia chrysosporium	B	Beta-Cyclodextrin	1	2022-08-09	2022-10-26	78	5.52	1	1.90478	775.085			64.0637
221	Phanerodontia chrysosporium	B	Beta-Cyclodextrin	2	2022-08-09	2022-10-26	78	5.56	0.4	1.7629	1032.19			69.732
222	Phanerodontia chrysosporium	B	Beta-Cyclodextrin	3	2022-08-09	2022-10-26	78	5.52	1.2	2.23914	595.912
223	Phanerodontia chrysosporium	B	Beta-Cyclodextrin	1	2022-08-09	2022-10-26	78	5.3	2.5	3.00358	598.833			162.344
224	Phanerodontia chrysosporium	B	Beta-Cyclodextrin	2	2022-08-09	2022-10-26	78	5.55	0.7	1.69564	1070.7			170.335
225	Phanerodontia chrysosporium	B	Beta-Cyclodextrin	3	2022-08-09	2022-10-26	78	5.34	1.8	2.66458	726.513			166.769
226	Phanerodontia chrysosporium	B	Beta-Cyclodextrin	1	2022-08-09	2022-10-26	78	5.54	0.6	1.73486	1037.78			343.236
227	Phanerodontia chrysosporium	B	Beta-Cyclodextrin	2	2022-08-09	2022-10-26	78	5.44	0.7	2.18686	845.855			359.634
228	Phanerodontia chrysosporium	B	Beta-Cyclodextrin	3	2022-08-09	2022-10-26	78	5.53	0.4	1.86472	1001.37			365.254
229	Umbelopsis	Z	Beta-Cyclodextrin	1	2022-08-09	2022-08-29	20	3.06	65.99	10.9022	-7.033	-21.7256	-26.1873	-31.9547	-166.086	-123.907	-138.559	-94.9871	0.460728	0.0304642	-154.327	7.72502	0.991332
230	Umbelopsis	Z	Beta-Cyclodextrin	2	2022-08-09	2022-08-29	20	3.05	61.64	11.7476	-11.171	-21.5954	-27.0386	-46.1734	-178.802	-178.525	-139.049	-138.758
231	Umbelopsis	Z	Beta-Cyclodextrin	3	2022-08-09	2022-08-29	20	3.05	65.6	11.4078	-9.281			-48.8367
232	Umbelopsis	Z	Beta-Cyclodextrin	1	2022-08-09	2022-08-29	20	3.04	68.73	12.6643	68.267	-18.9826	-18.5493	63.4371
233	Umbelopsis	Z	Beta-Cyclodextrin	2	2022-08-09	2022-08-29	20	3.05	66.53	12.3869	79.677			64.8239
234	Umbelopsis	Z	Beta-Cyclodextrin	3	2022-08-09	2022-08-29	20	2.92	72.75	14.334	63.329			68.3789
235	Umbelopsis	Z	Beta-Cyclodextrin	1	2022-08-09	2022-08-29	20	3.03	69.73	11.8781	101.374	-17.2665	-20.2783	162.445
236	Umbelopsis	Z	Beta-Cyclodextrin	2	2022-08-09	2022-08-29	20	3.04	64.51	10.4323	128.944			165.082
237	Umbelopsis	Z	Beta-Cyclodextrin	3	2022-08-09	2022-08-29	20	3.02	65.99	10.9868	118.684			165.065
238	Umbelopsis	Z	Beta-Cyclodextrin	1	2022-08-09	2022-08-29	20	3.04	67.95	12.09	97.322			350.444	18.9016	23.9716	-245.506	-241.752
239	Umbelopsis	Z	Beta-Cyclodextrin	2	2022-08-09	2022-08-29	20	3.03	67.44	11.5488	100.229			362.271	1.04926	20.0673	-265.162	-251.201
240	Umbelopsis	Z	Beta-Cyclodextrin	3	2022-08-09	2022-08-29	20	3.04	67.04	12.0065	96.461			361.94
241	Mortierella	Z	Beta-Cyclodextrin	1	2022-08-09	2022-10-26	78	5.56	0	0.566901	68.575			-30.3467
242	Mortierella	Z	Beta-Cyclodextrin	2	2022-08-09	2022-10-26	78	5.57	0	0.588826	16.01			-45.7374
243	Mortierella	Z	Beta-Cyclodextrin	3	2022-08-09	2022-10-26	78	5.55	0.2	0.684329	47.2			-51.7898
244	Mortierella	Z	Beta-Cyclodextrin	1	2022-08-09	2022-10-26	78	5.61	0	0.683907	1376.13			62.21
245	Mortierella	Z	Beta-Cyclodextrin	2	2022-08-09	2022-10-26	78	5.62	0	0.598313	1674.92			67.8394
246	Mortierella	Z	Beta-Cyclodextrin	3	2022-08-09	2022-10-26	78	5.63	0.2	0.658187	1510.73			65.8108
247	Mortierella	Z	Beta-Cyclodextrin	1	2022-08-09	2022-10-26	78	5.6	0.2	0.648489	2126.6			160.564
248	Mortierella	Z	Beta-Cyclodextrin	2	2022-08-09	2022-10-26	78	5.61	0	0.687491	1997.05
249	Mortierella	Z	Beta-Cyclodextrin	3	2022-08-09	2022-10-26	78	5.61	0	0.73598	1960.48			169.665
250	Mortierella	Z	Beta-Cyclodextrin	1	2022-08-09	2022-10-26	78	5.61	0.3	0.73577	1836.42			356.303
251	Mortierella	Z	Beta-Cyclodextrin	2	2022-08-09	2022-10-26	78	5.6	0.2	0.755798	1976.21			355.462
252	Mortierella	Z	Beta-Cyclodextrin	3	2022-08-09	2022-10-26	78	5.61	0	0.634996	1739.99			358.276
253	Paecilomyces lilacinus	A	Beta-Cyclodextrin	1	2022-08-09	2022-09-02	24	3.18	29.81	12.0261	-7.098	-19.0044	-19.6961	-34.4188	-163.473	-195.749	-133.654	-167.081	0.667366	0.00405989	-139.741	1.03973	0.999926
254	Paecilomyces lilacinus	A	Beta-Cyclodextrin	2	2022-08-09	2022-09-02	24	3.21	29.6	12.7054	-5.051	-19.216	-18.9714	-42.2389	-167.134	-206.967	-130.403	-171.993
255	Paecilomyces lilacinus	A	Beta-Cyclodextrin	3	2022-08-09	2022-09-02	24	3.2	28.6	12.1037	-10.021
256	Paecilomyces lilacinus	A	Beta-Cyclodextrin	1	2022-08-09	2022-09-02	24	3.21	21.39	12.7206	58.221	-18.1358	-19.8445	68.8169
257	Paecilomyces lilacinus	A	Beta-Cyclodextrin	2	2022-08-09	2022-09-02	24	3.23	29.29	13.1656	75.381			69.5599
258	Paecilomyces lilacinus	A	Beta-Cyclodextrin	3	2022-08-09	2022-09-02	24	3.19	28.65	12.7006	76.065			70.4702
259	Paecilomyces lilacinus	A	Beta-Cyclodextrin	1	2022-08-09	2022-09-02	24	3.21	27.66	13.6636	105.737			165.667
260	Paecilomyces lilacinus	A	Beta-Cyclodextrin	2	2022-08-09	2022-09-02	24	3.21	30.41	13.9041	102.394	-16.7395	-18.6562	169.752
261	Paecilomyces lilacinus	A	Beta-Cyclodextrin	3	2022-08-09	2022-09-02	24	3.2	29.48	13.8375	104.091			174.105
262	Paecilomyces lilacinus	A	Beta-Cyclodextrin	1	2022-08-09	2022-09-02	24	3.15	30.34	13.1009	118.954	-17.9315	-17.8307	353.324	94.6214	31.2708	-191.161	-237.972
263	Paecilomyces lilacinus	A	Beta-Cyclodextrin	2	2022-08-09	2022-09-02	24	3.18	29.23	13.6267	100.619			366.796	106.448	44.5492	-190.48	-235.768
264	Paecilomyces lilacinus	A	Beta-Cyclodextrin	3	2022-08-09	2022-09-02	24	3.15	28.8	13.1764	95.401			363.644
265	Penicillium janczewskii	A	Beta-Cyclodextrin	1	2022-08-09	2022-08-29	20	2.93	41.75	11.9966	-7.572	-20.3956	-19.2758	-28.673	-161.504	-120.901	-136.752	-94.95	0.682031	0.0362427	-134.747	8.86557	0.994384
266	Penicillium janczewskii	A	Beta-Cyclodextrin	2	2022-08-09	2022-08-29	20	2.95	40.02	10.6113	-10.662	-20.9096	-19.4014	-40.3321	-156.253	-120.351	-120.793	-83.382
267	Penicillium janczewskii	A	Beta-Cyclodextrin	3	2022-08-09	2022-08-29	20	2.92	42.91	10.8999	-9.595			-49.879
268	Penicillium janczewskii	A	Beta-Cyclodextrin	1	2022-08-09	2022-08-29	20	2.93	45.59	10.7578	99.53	-20.5084	-22.2519	62.1812
269	Penicillium janczewskii	A	Beta-Cyclodextrin	2	2022-08-09	2022-08-29	20	3	44.14	11.2948	105.346			64.6646
270	Penicillium janczewskii	A	Beta-Cyclodextrin	3	2022-08-09	2022-08-29	20	2.96	42.34	9.80977	115.055			70.0854
271	Penicillium janczewskii	A	Beta-Cyclodextrin	1	2022-08-09	2022-08-29	20	3.02	32.56	12.9242	82.588	-19.2033	-21.0015	163.389
272	Penicillium janczewskii	A	Beta-Cyclodextrin	2	2022-08-09	2022-08-29	20	2.95	42.25	13.0826	92.696			170.791
273	Penicillium janczewskii	A	Beta-Cyclodextrin	3	2022-08-09	2022-08-29	20	2.92	44.55	13.0923	85.12			168.752
274	Penicillium janczewskii	A	Beta-Cyclodextrin	1	2022-08-09	2022-08-29	20	2.92	44.17	10.6238	102.05	-20.556	-22.3582	328.139	101.671	47.8967	-170.515	-211.004
275	Penicillium janczewskii	A	Beta-Cyclodextrin	2	2022-08-09	2022-08-29	20	2.93	43.19	11.0777	99.364			359.48	99.0107	54.9638	-191.595	-223.994
276	Penicillium janczewskii	A	Beta-Cyclodextrin	3	2022-08-09	2022-08-29	20	2.92	43.4	12.5669	73.302			368.992
277	Control		Beta-Cyclodextrin	1	2022-08-09	2023-02-08	183	5.64		0.34364	51.506
278	Control		Beta-Cyclodextrin	2	2022-08-09	2023-02-08	183	5.62		0.244975	25.032
279	Control		Beta-Cyclodextrin	1	2022-08-09	2023-02-08	183	5.67		0.294097	1437.26
280	Control		Beta-Cyclodextrin	2	2022-08-09	2023-02-08	183	5.67		0.305903	1503.13
281	Control		Beta-Cyclodextrin	1	2022-08-09	2023-02-08	183	5.68		0.304427	1651.2
282	Control		Beta-Cyclodextrin	2	2022-08-09	2023-02-08	183	5.67		0.314336	1621.91
283	Control		Beta-Cyclodextrin	1	2022-08-09	2023-02-08	183	5.67		0.333521	2027.49
284	Control		Beta-Cyclodextrin	2	2022-08-09	2023-02-08	183	5.67		0.261209	1258.49
