# Supplementary material for: Fungi present distinguishable isotopic signals in their lipids when grown on glycolytic versus tricarboxylic acid cycle intermediates
Source: Copernicus journal article supplement (doi:10.5194/bg-22-3127-2025), 2025-07-01
Supplement: Supplementary file 2 [file bg-22-3127-2025-supplement.zip]

## Text S1. Mixing model

$\delta^{13}\text{C-CO}_2$  was proportional to inverse of  $\text{CO}_2$  concentration in the headspace, as expected for stable isotopic mixing models (cf. Kendall and Caldwell, 1998). In our case, the labeled bicarbonate amendment could contribute to a total  $\text{CO}_2$  concentration ( $[\text{CO}_2]$ ) of  $\sim 0.3\%$ , which mixed with  $\text{CO}_2$  released from respiration of the substrates during the incubation; this assumption neglects the known fractionation of  $\text{CO}_2$  exchange between the headspace and medium, which we assume to be minimal given the high label (target AT%  $^{13}\text{C} = 10\%$ ). Data from all incubations plotted along a hyperbolic curve, which was modeled as a simple inverse relationship:

$$\delta^{13}\text{C}_{\text{CO}_2} = (929 \times 1/[\text{CO}_2]) + \delta^{13}\text{C}_{\text{subs}}$$

Equation S1

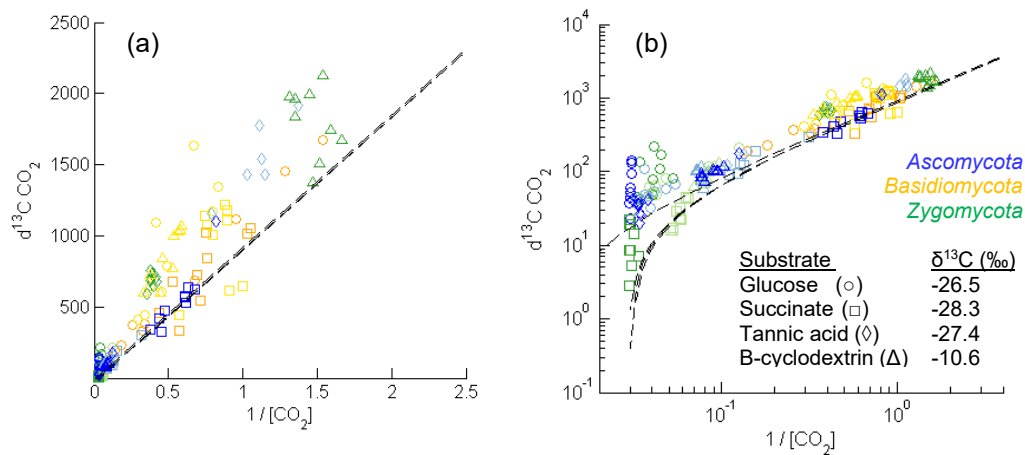

**Figure S1.** Hyperbolic evolution of  $\delta^{13}\text{C-CO}_2$  with increasing  $[\text{CO}_2]$  released from respiration, for incubations of *Ascomycota* (blue), *Basidiomycota* (orange/yellow), or *Zygomycota* (green) with glucose (circles), succinate (squares), tannic acid (diamonds), or  $\beta$ -cyclodextrin (triangles). Panel B is the log-log plot of panel A, indicating the expected mixing lines for respiration of each substrate.

The fit gave an  $R^2$  of 0.8047 and RMSE of 251. These values improved when considering only incubations in which  $\text{CO}_2$  levels increased above 1% (i.e., those that yielded sufficient biomass).

Because fungal lipid production occurred during the hyperbolic evolution of  $\delta^{13}\text{C-CO}_2$ , the accuracy of the %IC calculation (Eq. 1, main text) can be improved by estimating the weighted average  $\delta^{13}\text{C}$  of inorganic C that could have been incorporated into lipids during the incubation as respired  $\text{CO}_2$  accumulated. The weighted average stable C isotope composition of  $\text{CO}_2$  that fungi were exposed to during the incubation can be approximated by the integral of the hyperbolic curve, normalized by  $[\text{CO}_2]$  at harvest. The resulting integral is a logarithmic function of  $[\text{CO}_2]$ . Because we are considering incubations in which  $[\text{CO}_2]$  approached 1%, where the integral function approaches zero (i.e.,  $\text{LN } 1 = 0$ ), the data were rather fitted by a hyperbolic curve described by the function:

$$\delta^{13}\text{C}_{\text{CO}_2} = (a / (1 + [\text{CO}_2])) + b$$

Furthermore, the trend was more accurately approximated by plotting against  $^{13}\text{F-CO}_2$  rather than  $\delta^{13}\text{C-CO}_2$ , with improved  $R^2$  of 0.8472 and RMSE of 0.0016, and coefficients  $a = 0.02478 \pm 0.00167$  and  $b = 0.01054 \pm 0.00037$  (Fig. S2). Thus, the weighted average equation becomes:

$$\text{Weighted average } ^{13}\text{F}_{\text{CO}_2} = (0.02478 \times \text{LN}(1+[\text{CO}_2])) + (0.01054 \times [\text{CO}_2]) \quad \text{Equation S2}$$

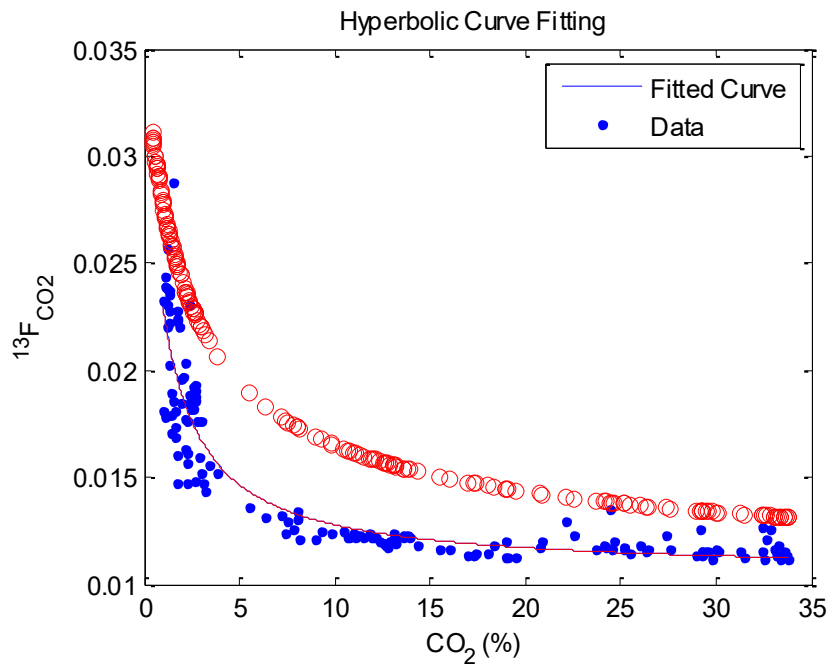

Figure S2. Hyperbolic curve of decreasing  $^{13}\text{F}_{\text{CO}_2}$  with increasing  $\text{CO}_2$  in headspace during fungal respiration of substrates (filled blue circles). The fitted curve representing Eq. S2 is shown in pink. The weighted average  $^{13}\text{F}_{\text{CO}_2}$  during fungal production in each incubation (open red circles) was estimated as the integral of the fitted curve normalized by the  $\text{CO}_2$  concentration at harvest.

Finally, the estimated weighted average  $^{13}\text{F}_{\text{CO}_2}$  was used to calculate the heterotrophic incorporation of inorganic C into lipids (%IC) via Eq. 1 of the main text, which amounted to < 3% for all experimental incubations. Sensitivity analysis of the fitted coefficients (i.e., 95% confidence intervals) indicated a coefficient of variation of the reported %IC values of up to 30%, with the highest reported fungal %IC values (i.e., *Penicillium jancewskii* grown on tannic acid) ranging from 1.8 to 2.8%.

#### ***Literature cited***

Kendall, C., Caldwell, E. A. (1998). Fundamentals of isotope geochemistry. In *Isotope tracers in catchment hydrology* (pp. 51-86). Elsevier.
